# Supplementary figures and images for: Extraction of small extracellular vesicles by label-free and biocompatible on-chip magnetic separation
Source: Royal Society of Chemistry journal article supplement (doi:10.1039/d2lc00217e), 2022-01-01

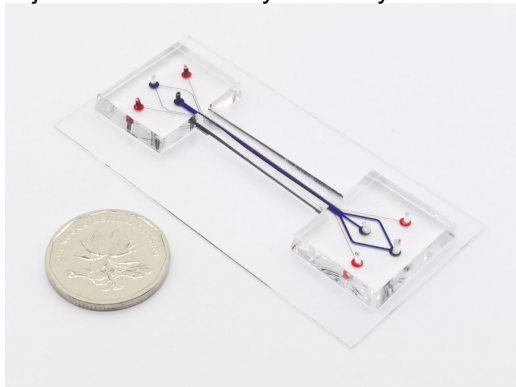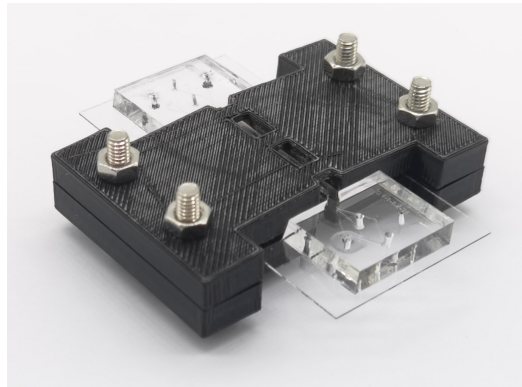

Supplement: d2lc00217e2.pdf [file d2lc00217e2.pdf]

# Magnetic flux density norm (T)

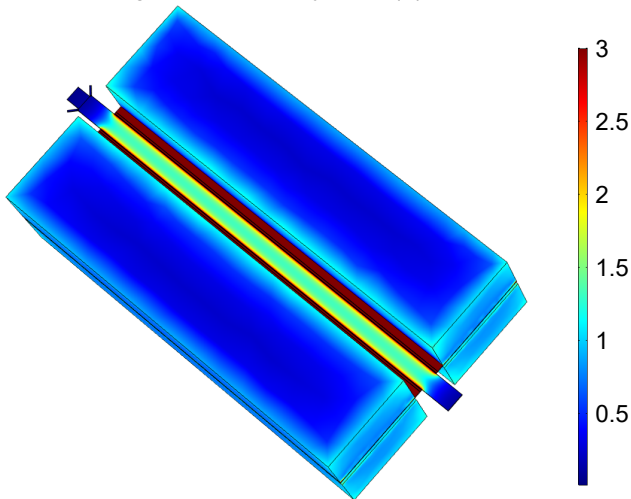

Supplement: d2lc00217e3.pdf [file d2lc00217e3.pdf]

**A**

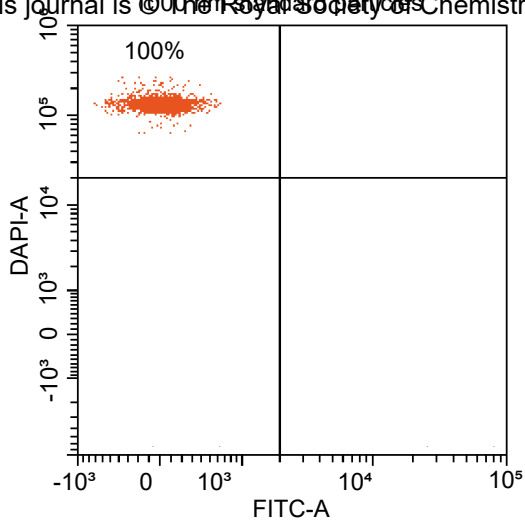

**B**

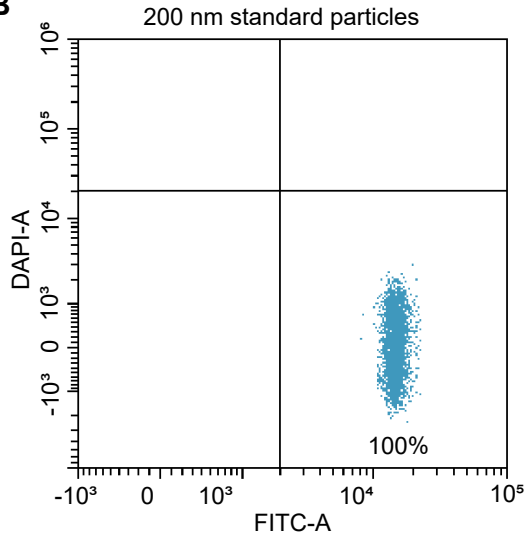

Supplement: d2lc00217e4.pdf [file d2lc00217e4.pdf]

(1)

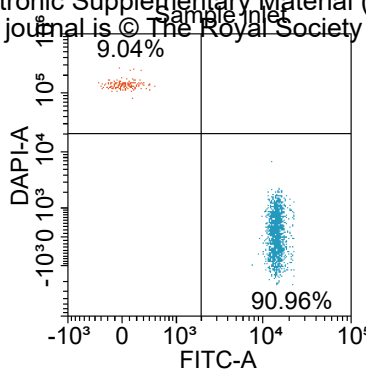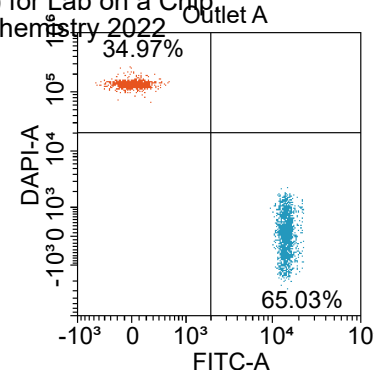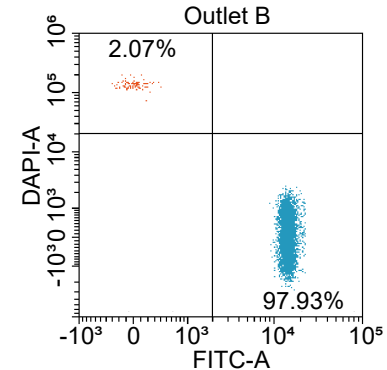

(2)

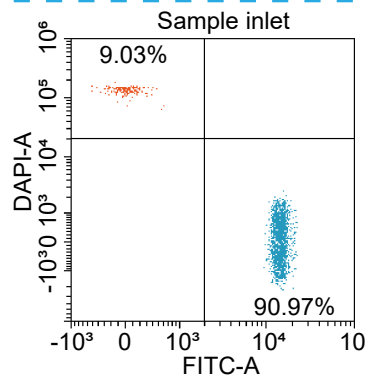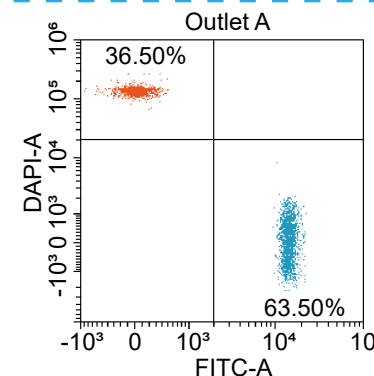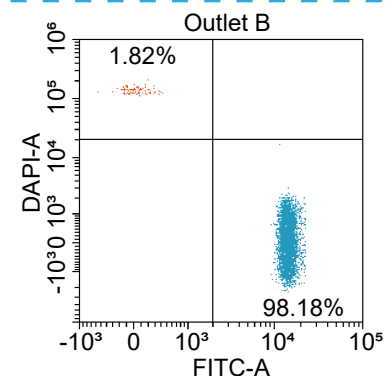

(3)

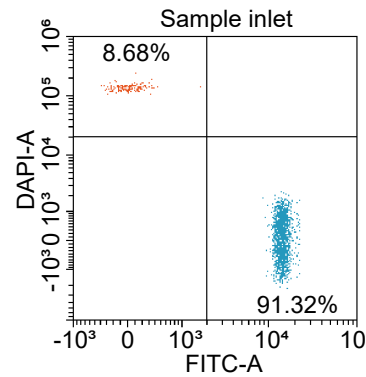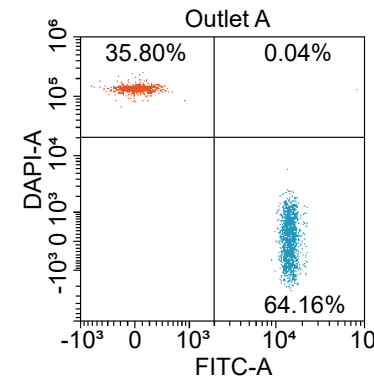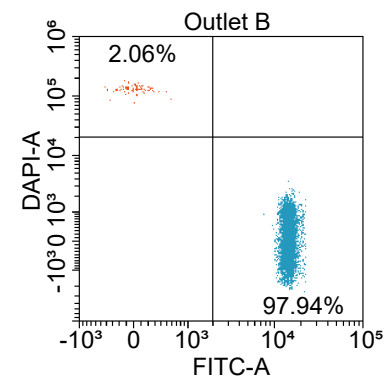

Supplement: d2lc00217e5.pdf [file d2lc00217e5.pdf]

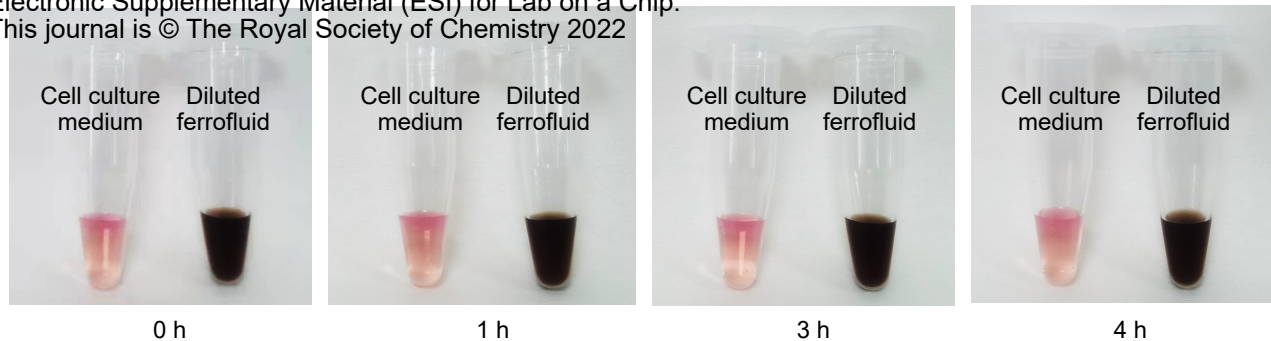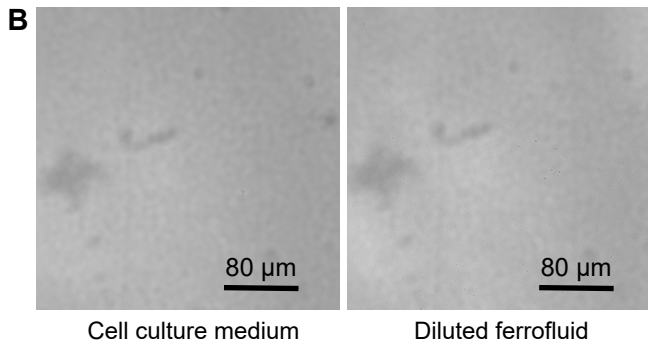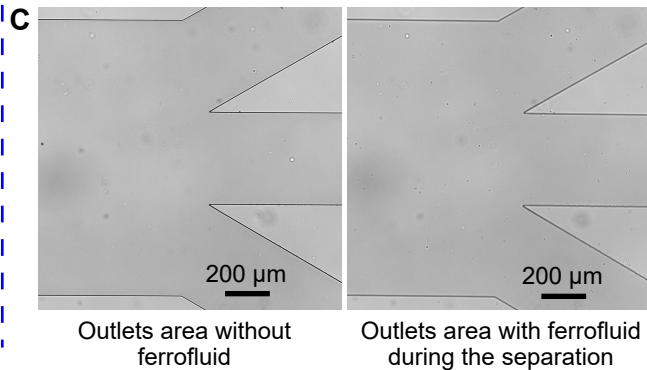

Supplement: d2lc00217e6.pdf [file d2lc00217e6.pdf]

Cell culture medium  
EMG 805 (0.001X)

EMG 805 (0.002X)  
EMG 805 (0.005X)

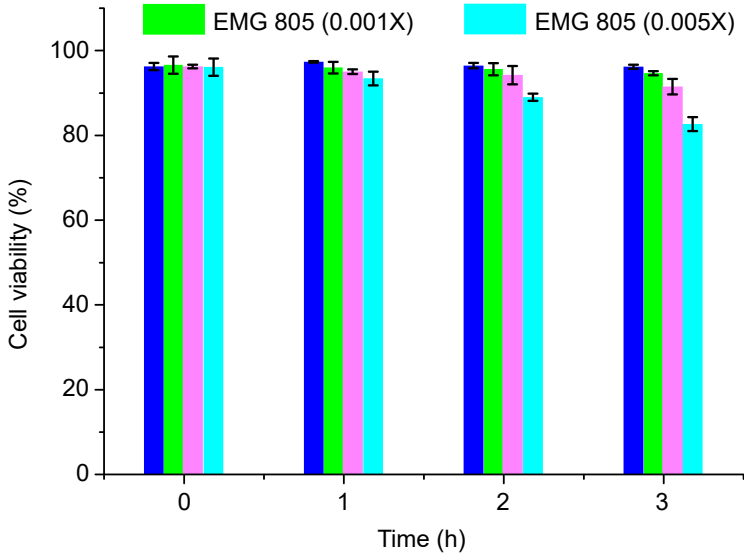

Supplement: d2lc00217e7.pdf [file d2lc00217e7.pdf]
